# Supplementary material for: Structures, aromaticity, AIM, and NBO analyses of hydroxy and mercapto azaazulene: a DFT study
Source: Royal Society of Chemistry journal article supplement (doi:10.1039/d4nj02628d), 2024-01-01
Supplement: d4nj02628d1.pdf [file d4nj02628d1.pdf]

## Supporting information

### **Structures, Aromaticity, AIM, and NBO analyses of hydroxy and mercapto azaazulene: A DFT Study**

Abrar Sameh,<sup>a</sup> M. T. Abdel-Aal,<sup>a</sup> Ahmed M. El-Nahas,<sup>a</sup> Asmaa B. El-Meligy<sup>a\*</sup>

<sup>a</sup> Chemistry Department, Faculty of Science, Menoufia University, Shebin El-Kom, 32512, Egypt

## Computational Methods

$$\text{percentage contents ( } T\%) = \left( e^{-\frac{\Delta G_i}{RT}} / \sum_i e^{-\frac{\Delta G_i}{RT}} \right) \times 100 \quad (1)$$

where R represents the gas constant and T represents the temperature in Kelvin.

$$HOMA = 1 - \frac{1}{n} \sum_{j=1}^n \alpha_i (R_{opt,i} - R_j)^2 \quad (2)$$

Where n is the number of bonds forming the ring,  $\alpha_i$  is the normalization constant ( $\alpha_{CC} = 257.7$  and  $\alpha_{CN} = 93.52$ ).  $R_{opt}$  denotes the optimized bond length; for the C–C bond,  $R_{opt} = 1.388 \text{ \AA}$  and the C–N bond,  $R_{opt} = 1.334 \text{ \AA}$ .

$$I_{ring}(A) = \sum_{i_1, i_2, \dots, i_N} n_{i_1} \dots n_{i_N} S_{i_1 i_2}(A_1) S_{i_2 i_3}(A_2) \dots S_{i_N i_1}(A_N) \quad (3)$$

Where  $n_i \in [0.1]$  is the occupancy of MO, i and  $S_{ij}$  is the overlap between MOs i and j within the molecular space allocated to atom A. MCI is calculated by adding up all the possible  $I_{ring}$  values derived from permutations of the atoms in A. MCI is defined as:

$$MCI(A) = \frac{1}{2N} \sum_{P(A)} I_{ring}(A) \quad (4)$$

Where  $P(A)$  is an operator that acts on A that generates all the N permutations of its atoms.

$$FLU = \frac{1}{n} \sum_{A-B}^{ring} \left[ \left( \frac{FLU(B)}{FLU(A)} \right)^\alpha \left( \frac{\delta(A,B) - \delta_{ref}(A,B)}{\delta_{ref}(A,B)} \right) \right]^2 \quad (5)$$

Where the summation is applied to all neighbouring pairs of atoms around the ring, n equals the number of atoms in the ring,  $\delta_{ref}$  is the reference delocalization index value [ $\delta_{ref}(C-C) = 1.468$  and  $\delta_{ref}(C-N) = 1.566$ ],  $\alpha$  is a basic function to make sure that the atomic valence ratio is higher than one. While FLU- $\pi$  is determined by considering only the fluctuation of  $\pi$  electrons.

$$\alpha = \begin{cases} 1 & FLU(B) > FLU(A) \\ -1 & FLU(B) \leq FLU(A) \end{cases} \quad (6)$$

FLU in aromatic species is close to zero, while it is higher than zero in non-aromatic or antiaromatic species.

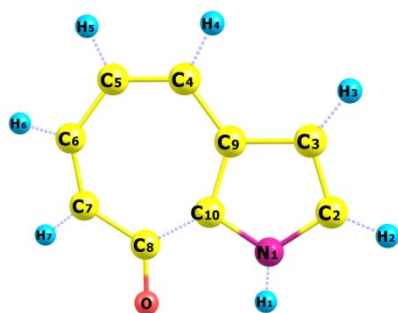

**8O-AZ**

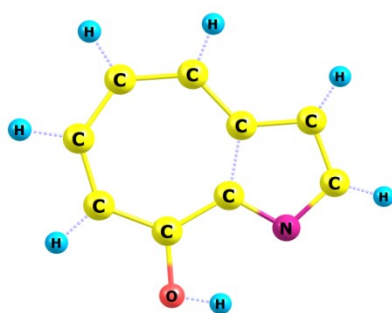

**8OH-AZ**

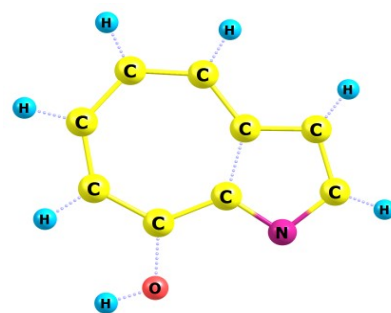

**8OH-AZ-R**

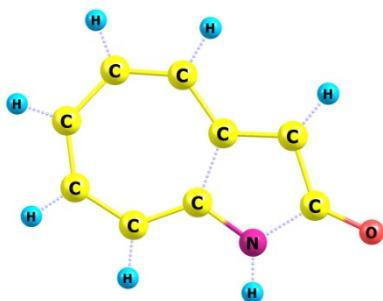

**2O-AZ**

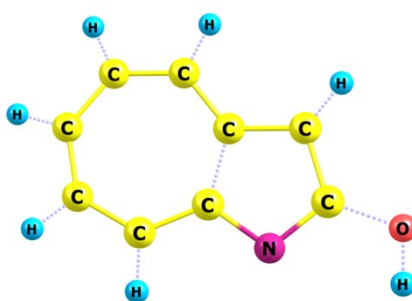

**2OH-AZ**

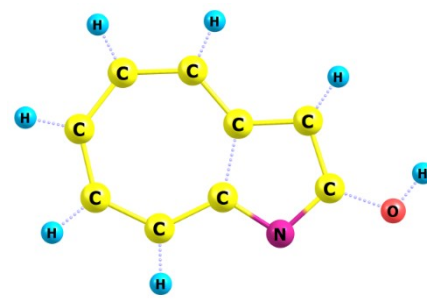

**2OH-AZ-R**

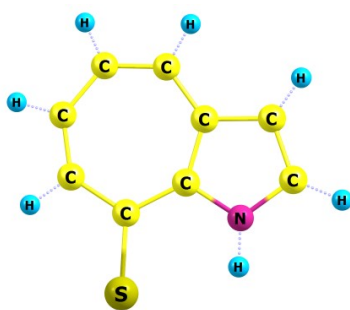

**8S-AZ**

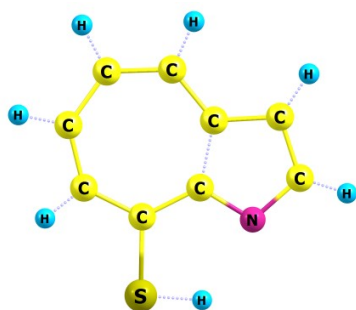

**8SH-AZ**

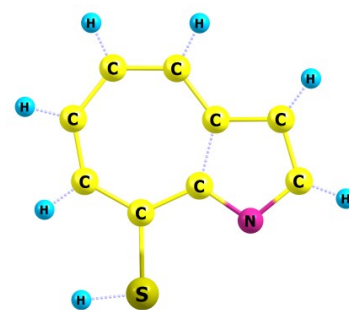

**8SH-AZ-R**

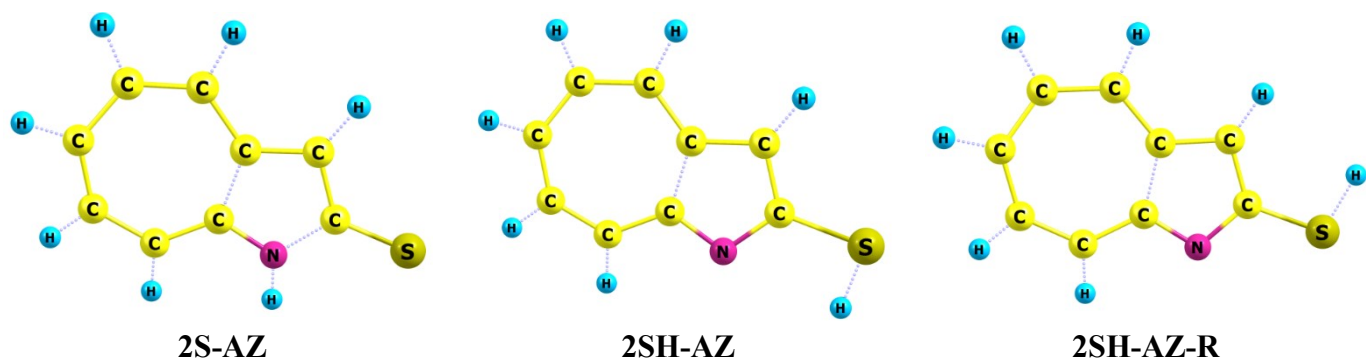

**Fig. S1** Optimized structures for the investigated tautomers and rotamers at B3LYP/6-311+G(d,p).

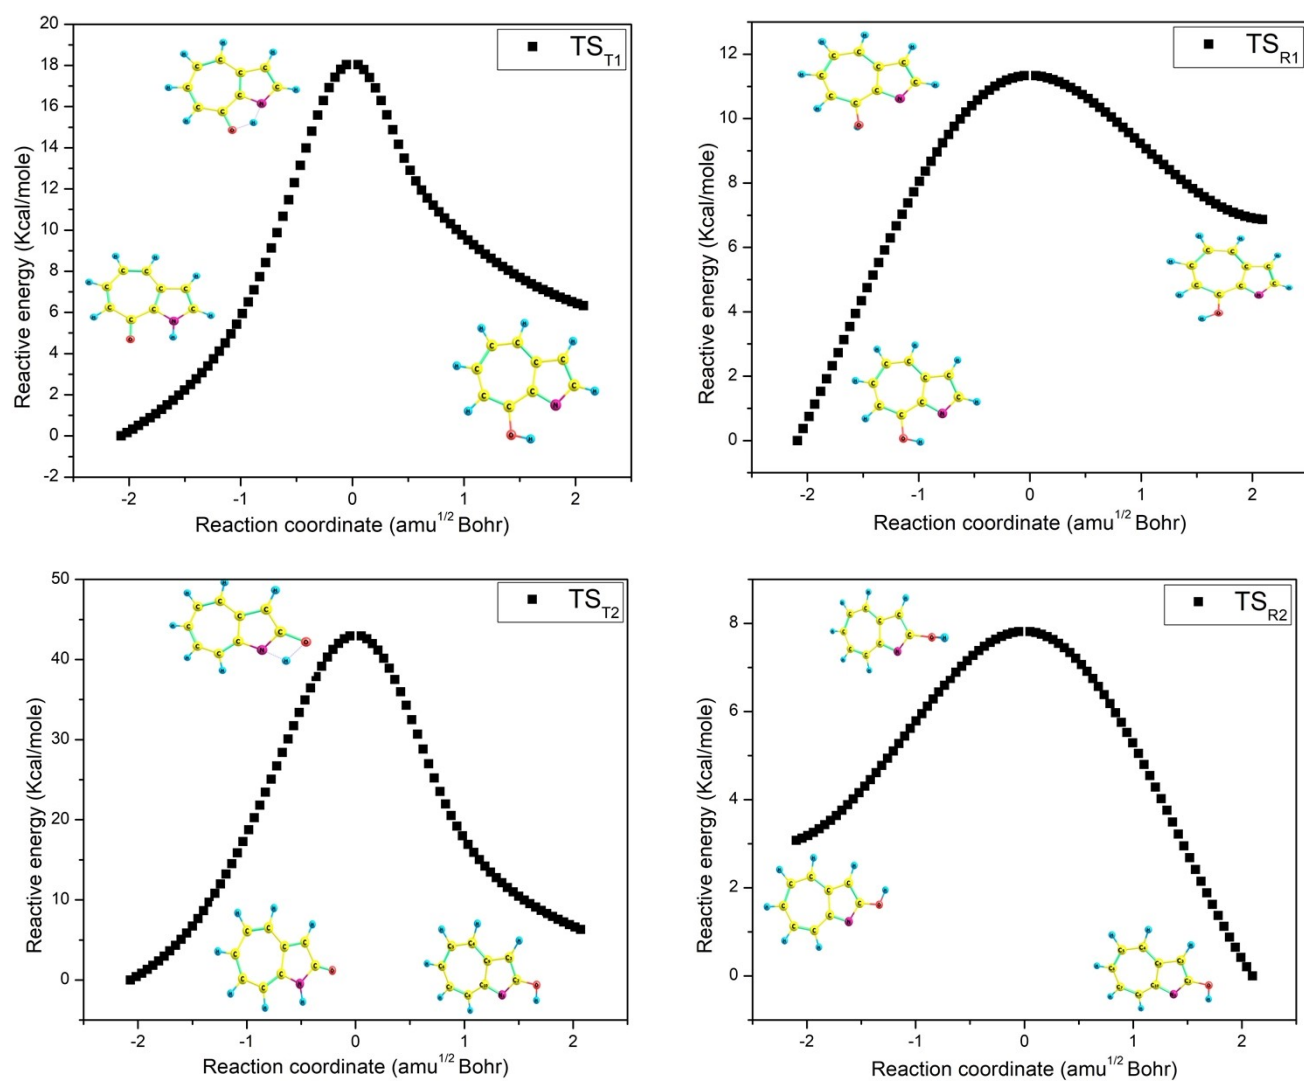

**Fig. S2** Relative energy profiles from the IRC calculation for tautomerization and rotamerization of **8OH-AZ** and **2OH-AZ** at the B3LYP/6-311+G(d,p) level.

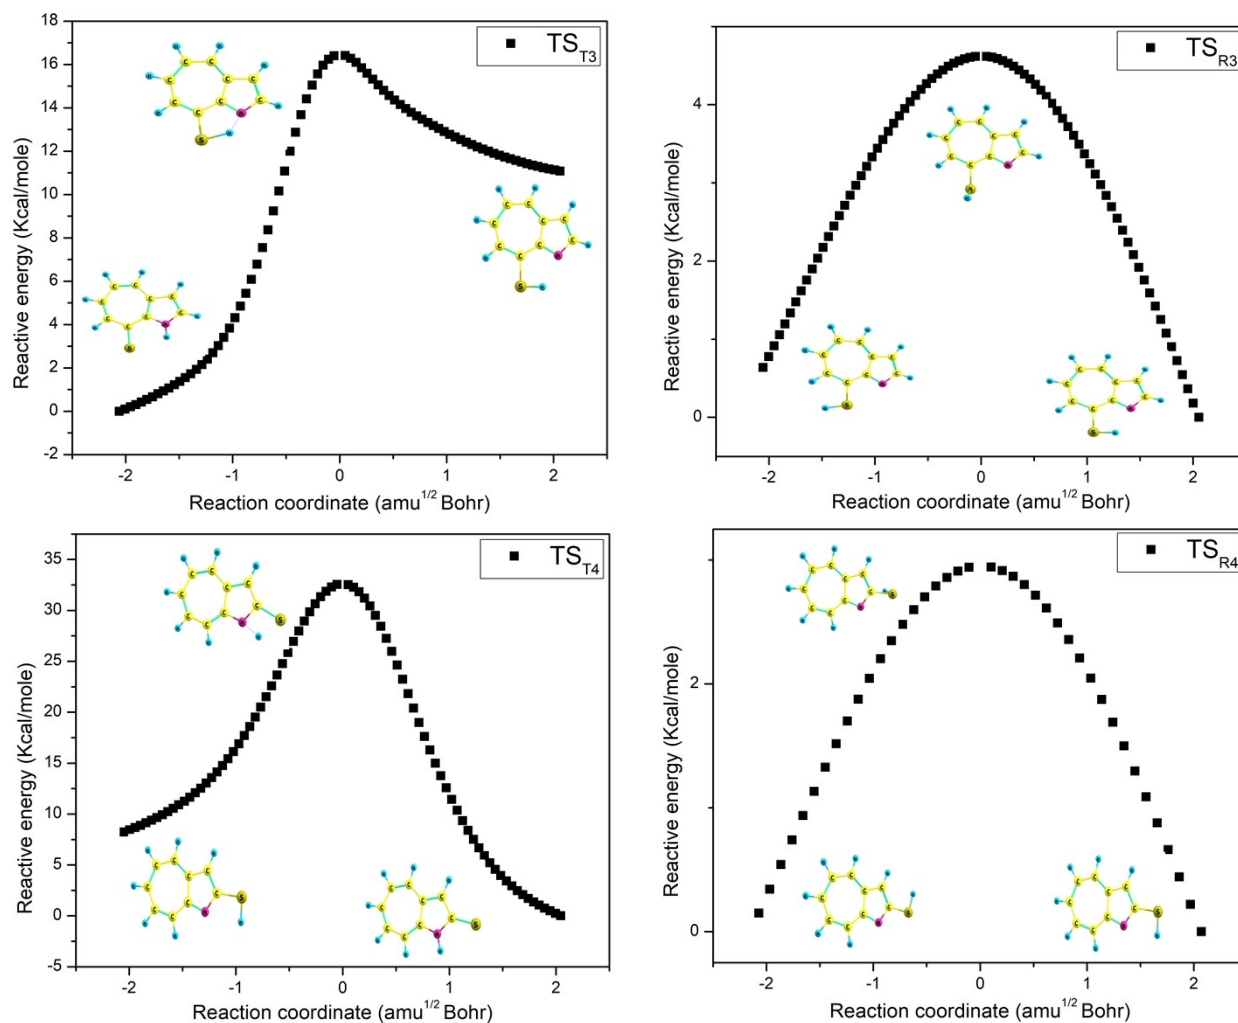

**Fig. S3** Relative energy profiles from the IRC calculation for tautomerization and rotamerization of **8SH-AZ** and **2SH-AZ** at the B3LYP/6-311+G(d,p) level.

-3.000e-

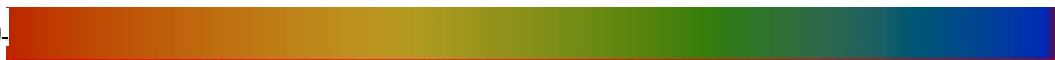

3.000e-

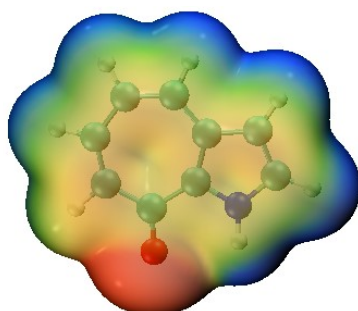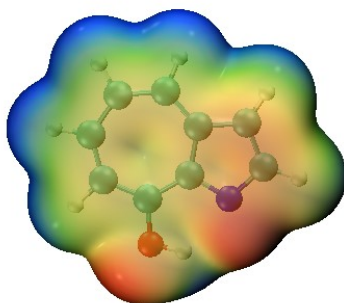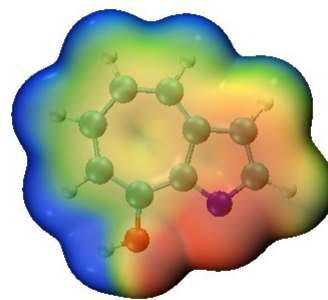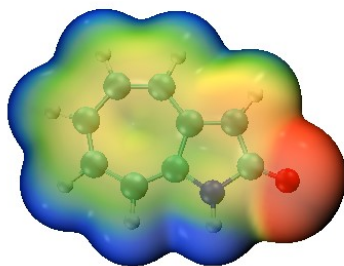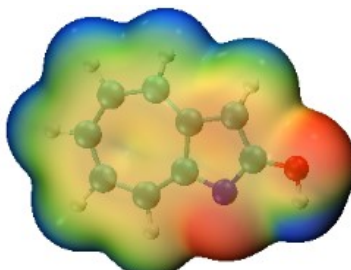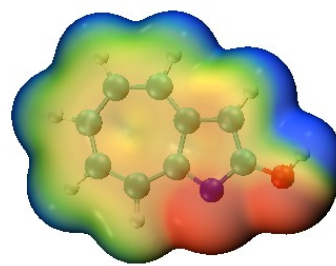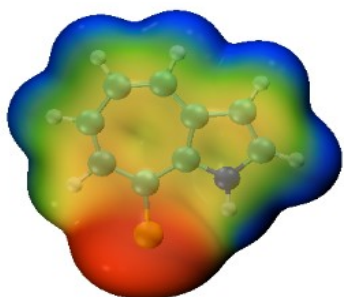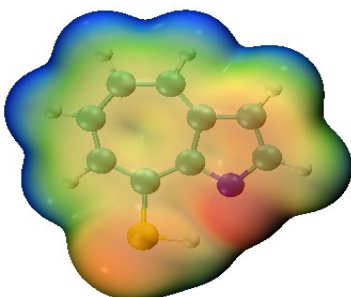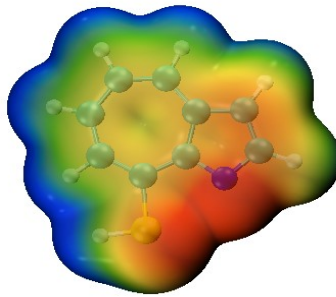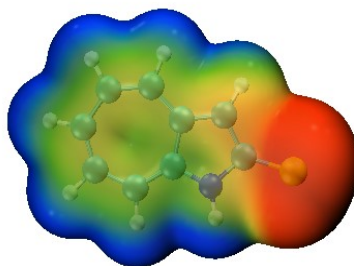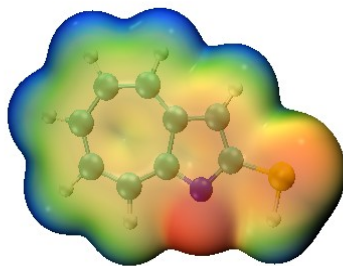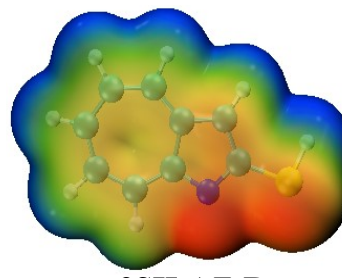

**Fig. S4** Electrostatic potential surface of the studied structures at B3LYP/6-311+G(d,p) in the gas phase.

**Table S1** Geometrical parameters for the investigated tautomers and rotamers were calculated at B3LYP/6-311+G(d,p) in the gas phase, bond lengths R in Å and bond angles < in degrees.

| Parameters              | <b>8O-AZ</b> | <b>8OH-AZ</b> | <b>8OH-AZ-R</b> | <b>2O-AZ</b> | <b>2OH-AZ</b> | <b>2OH-AZ-R</b> |
|-------------------------|--------------|---------------|-----------------|--------------|---------------|-----------------|
| <b>R(N1-C2)</b>         | 1.369        | 1.357         | 1.355           | 1.426        | 1.340         | 1.337           |
| <b>R(N1-C10)</b>        | 1.363        | 1.347         | 1.343           | 1.363        | 1.354         | 1.350           |
| <b>R(C2-C3)</b>         | 1.373        | 1.395         | 1.394           | 1.450        | 1.407         | 1.412           |
| <b>R(C8-C10)</b>        | 1.457        | 1.404         | 1.406           | 1.373        | 1.387         | 1.389           |
| <b>R(C8/C2-O)</b>       | 1.240        | 1.341         | 1.351           | 1.217        | 1.340         | 1.345           |
| <b>R(N/O-H)</b>         | 1.011        | 0.980         | 0.964           | 1.009        | 0.967         | 0.963           |
| <b>R(N/O...H)</b>       | 2.393        | 2.041         |                 | 2.634        | 2.324         |                 |
| <b>R(N...O)</b>         | 2.702        | 2.651         | 2.696           | 2.330        | 2.331         | 2.303           |
| <b>&lt;(C2-N1-C10)</b>  | 110.54       | 105.68        | 105.85          | 112.58       | 105.49        | 105.50          |
| <b>&lt;(N1-C2-C3)</b>   | 108.21       | 112.81        | 113.38          | 104.02       | 114.61        | 114.41          |
| <b>&lt;(N1-C2-O)</b>    | -            | -             | -               | 123.37       | 120.81        | 118.32          |
| <b>&lt;( C8/C2-O-H)</b> | -            | 105.75        | 109.94          | -            | 107.21        | 109.56          |
| <b>&lt;(C10-C8-O)</b>   | 118.92       | 116.47        | 115.20          | -            | -             | -               |
| <b>&lt;(C9-C10-N1)</b>  | 107.29       | 111.32        | 110.77          | 105.68       | 109.96        | 110.45          |
|                         | <b>8S-AZ</b> | <b>8SH-AZ</b> | <b>8SH-AZ-R</b> | <b>2S-AZ</b> | <b>2SH-AZ</b> | <b>2SH-AZ-R</b> |
| <b>R(N1-C2)</b>         | 1.367        | 1.355         | 1.354           | 1.399        | 1.348         | 1.347           |
| <b>R(N1-C10)</b>        | 1.363        | 1.347         | 1.344           | 1.363        | 1.351         | 1.350           |
| <b>R(C2-C3)</b>         | 1.373        | 1.393         | 1.395           | 1.429        | 1.408         | 1.409           |
| <b>R(C8-C10)</b>        | 1.439        | 1.408         | 1.404           | 1.377        | 1.390         | 1.390           |
| <b>R(C8/C2-S)</b>       | 1.692        | 1.765         | 1.774           | 1.665        | 1.759         | 1.761           |
| <b>R(N/S-H)</b>         | 1.016        | 1.358         | 1.350           | 1.010        | 1.348         | 1.349           |
| <b>R(N/S...H)</b>       | 2.530        | 2.107         | -               | 2.895        | 2.574         | -               |
| <b>R(N...S)</b>         | 2.979        | 2.976         | 2.851           | 2.702        | 2.717         | 2.668           |
| <b>&lt;(C2-N1-C10)</b>  | 111.04       | 106.44        | 106.19          | 112.83       | 105.71        | 105.77          |
| <b>&lt;(N1-C2-C3)</b>   | 108.31       | 112.94        | 113.13          | 104.73       | 113.79        | 113.81          |
| <b>&lt;(N1-C2-S)</b>    | -            | -             | -               | 123.49       | 121.40        | 117.72          |
| <b>&lt;( C8/C2-S-H)</b> | -            | 93.19         | 95.20           | -            | 94.48         | 96.02           |
| <b>&lt;(C10-C8-S)</b>   | 119.90       | 118.11        | 113.88          | -            | -             | -               |
| <b>&lt;(C9-C10-N1)</b>  | 106.50       | 110.12        | 110.44          | 105.39       | 110.29        | 110.30          |

**Table S2** Absolute Gibbs free energy  $G$  (au) and relative Gibbs free energy  $\Delta G$  (kcal/mol), at  $T = 298.15$  K, for the investigated tautomers and rotamers, in the gas-phase calculated at the B3LYP / 6-311+G(d,p), M06-2X/6-311++G(2d,2p), G3MP2 levels of theory.

| Tautomers       | B3LYP / 6-311+G(d,p) |                       | M062X/6-311++G(2d,2p) |                       | G3MP2       |                       |
|-----------------|----------------------|-----------------------|-----------------------|-----------------------|-------------|-----------------------|
|                 | G (au)               | $\Delta G$ (Kcal/mol) | G (au)                | $\Delta G$ (Kcal/mol) | G (au)      | $\Delta G$ (Kcal/mol) |
| <b>8O-AZ</b>    | -477.156708          | 0.00                  | -476.973536           | 0.00                  | -476.416906 | 0.00                  |
| <b>8OH-AZ</b>   | -477.144592          | 7.60                  | -476.961723           | 7.41                  | -476.406403 | 6.59                  |
| <b>8OH-AZ-R</b> | -477.128116          | 17.94                 | -476.945852           | 17.37                 | -476.39084  | 16.36                 |
| <b>2O-AZ</b>    | -477.155904          | 0.51                  | -476.967998           | 3.48                  | -476.413101 | 2.38                  |
| <b>2OH-AZ</b>   | -477.144714          | 7.53                  | -476.960378           | 8.26                  | -476.405402 | 7.22                  |
| <b>2OH-AZ-R</b> | -477.137948          | 11.77                 | -476.954220           | 12.12                 | -476.399611 | 10.85                 |
| <b>8S-AZ</b>    | -800.124671          | 0.00                  | -799.936286           | 0.00                  | -799.023033 | 0.00                  |
| <b>8SH-AZ</b>   | -800.109956          | 9.23                  | -799.920064           | 10.18                 | -799.010344 | 7.96                  |
| <b>8SH-AZ-R</b> | -800.104483          | 12.67                 | -799.915887           | 12.80                 | -799.006285 | 10.51                 |
| <b>2S-AZ</b>    | -800.121035          | 2.28                  | -799.927737           | 5.37                  | -799.015041 | 5.02                  |
| <b>2SH-AZ</b>   | -800.111753          | 8.11                  | -799.920380           | 9.98                  | -799.00979  | 8.31                  |
| <b>2SH-AZ-R</b> | -800.109957          | 9.23                  | -799.918950           | 10.88                 | -799.008805 | 8.93                  |



**Table S3** Absolute zero-point corrected energy  $E_0$  (au) and relative zero-point corrected energy  $\Delta E$  (kcal/mol) for the investigated tautomers and rotamers, in the gas-phase calculated at the B3LYP / 6-311+G(d,p) and M06-2X/6-311++G(2d,2p) levels of theory, and in water calculated at M06-2X/6-311++G(2d,2p).

| Tautomers       | B3LYP / 6-311+G(d,p) |                         | M062X/6-311++G(2d,2p) |                         | G3MP2       |                         |
|-----------------|----------------------|-------------------------|-----------------------|-------------------------|-------------|-------------------------|
|                 | $E_0$ (au)           | $\Delta E_0$ (Kcal/mol) | $E_0$ (au)            | $\Delta E_0$ (Kcal/mol) | $E_0$ (au)  | $\Delta E_0$ (Kcal/mol) |
| <b>8O-AZ</b>    | -477.123841          | 0.00                    | -476.940669           | 0.00                    | -476.383805 | 0.00                    |
| <b>8OH-AZ</b>   | -477.111986          | 7.44                    | -476.929117           | 7.25                    | -476.37364  | 6.38                    |
| <b>8OH-AZ-R</b> | -477.095210          | 17.97                   | -476.912946           | 17.40                   | -476.357766 | 16.34                   |
| <b>2O-AZ</b>    | -477.122933          | 0.57                    | -476.935027           | 3.54                    | -476.379797 | 2.52                    |
| <b>2OH-AZ</b>   | -477.111947          | 7.46                    | -476.927611           | 8.19                    | -476.372456 | 7.12                    |
| <b>2OH-AZ-R</b> | -477.105109          | 11.75                   | -476.921381           | 12.10                   | -476.366584 | 10.81                   |
| <b>8S-AZ</b>    | -800.091003          | 0.00                    | -799.902618           | 0.00                    | -798.989145 | 0.00                    |
| <b>8SH-AZ</b>   | -800.076299          | 9.23                    | -799.886407           | 10.17                   | -798.976379 | 8.01                    |
| <b>8SH-AZ-R</b> | -800.070555          | 12.83                   | -799.88196            | 12.96                   | -798.972187 | 10.64                   |
| <b>2S-AZ</b>    | -800.087182          | 2.40                    | -799.893885           | 5.48                    | -798.980936 | 5.15                    |
| <b>2SH-AZ</b>   | -800.077730          | 8.33                    | -799.886357           | 10.20                   | -798.975543 | 8.54                    |
| <b>2SH-AZ-R</b> | -800.075898          | 9.48                    | -799.884891           | 11.12                   | -798.974495 | 9.19                    |

**Table S4** Four NICS parameters (in ppm) for the five-/four-membered ring transition states of the investigated structures calculated at B3LYP/6-311+G(d, p) level in the gas phase.

|                                     | NICS (0) | NICS <sub>zz</sub> (0) | NICS (1) | NICS <sub>zz</sub> (1) |
|-------------------------------------|----------|------------------------|----------|------------------------|
| TS <sub>T1</sub> (five-member ring) | -0.13    | 23.53                  | -1.43    | 0.34                   |
| TS <sub>T2</sub> (four-member ring) | 1.33     | 41.56                  | 0.43     | 6.05                   |
| TS <sub>T3</sub> (five-member ring) | -1.53    | 22.42                  | -1.64    | 1.27                   |
| TS <sub>T4</sub> (four-member ring) | -0.59    | 41.57                  | 0.27     | 8.64                   |

**Table S5** Global chemical descriptor (eV) of the investigated tautomers and rotamers estimated at B3LYP/6-311+G(d,p) level in the gas phase.

|                 | E <sub>HOMO</sub> | E <sub>LUMO</sub> | E <sub>g</sub> | IP   | EA   | χ    | η    | S    | μ     | ω    |
|-----------------|-------------------|-------------------|----------------|------|------|------|------|------|-------|------|
| <b>8O-AZ</b>    | -6.29             | -2.05             | 4.24           | 6.29 | 2.05 | 4.17 | 2.12 | 0.24 | -4.17 | 4.11 |
| <b>8OH-AZ</b>   | -6.33             | -2.41             | 3.92           | 6.33 | 2.41 | 4.37 | 1.96 | 0.26 | -4.37 | 4.87 |
| <b>8OH-AZ-R</b> | -6.18             | -2.35             | 3.82           | 6.18 | 2.35 | 4.26 | 1.91 | 0.26 | -4.26 | 4.75 |
| <b>2O-AZ</b>    | -5.87             | -2.34             | 3.53           | 5.87 | 2.34 | 4.11 | 1.76 | 0.28 | -4.11 | 4.78 |
| <b>2OH-AZ</b>   | -6.13             | -2.30             | 3.83           | 6.13 | 2.30 | 4.21 | 1.92 | 0.26 | -4.21 | 4.63 |
| <b>2OH-AZ-R</b> | -6.17             | -2.30             | 3.87           | 6.17 | 2.30 | 4.23 | 1.94 | 0.26 | -4.23 | 4.63 |
| <b>8S-AZ</b>    | -5.88             | -2.49             | 3.39           | 5.88 | 2.49 | 4.18 | 1.70 | 0.29 | -4.18 | 5.15 |
| <b>8SH-AZ</b>   | -6.33             | -2.54             | 3.79           | 6.33 | 2.54 | 4.44 | 1.90 | 0.26 | -4.44 | 5.19 |
| <b>8SH-AZ-R</b> | -6.28             | -2.52             | 3.76           | 6.28 | 2.52 | 4.40 | 1.88 | 0.27 | -4.40 | 5.15 |
| <b>2S-AZ</b>    | -5.59             | -2.71             | 2.87           | 5.59 | 2.71 | 4.15 | 1.44 | 0.35 | -4.15 | 6.00 |
| <b>2SH-AZ</b>   | -6.07             | -2.49             | 3.58           | 6.07 | 2.49 | 4.28 | 1.79 | 0.28 | -4.28 | 5.11 |
| <b>2SH-AZ-R</b> | -6.10             | -2.49             | 3.60           | 6.10 | 2.49 | 4.30 | 1.80 | 0.28 | -4.30 | 5.12 |

**Table S6** The coordinates of optimized geometry of the investigated structures at B3LYP / 6-311+G(d,p) in the gas phase.

| Structure                                                                                                                                                                                                                                                                                                                                                                                                                                                                                                                                                                                                                                                          | Coordinate   |              |              |              |
|--------------------------------------------------------------------------------------------------------------------------------------------------------------------------------------------------------------------------------------------------------------------------------------------------------------------------------------------------------------------------------------------------------------------------------------------------------------------------------------------------------------------------------------------------------------------------------------------------------------------------------------------------------------------|--------------|--------------|--------------|--------------|
|  <p style="text-align: center;"><b>8O-AZ</b></p> <p>Zero-point correction= 0.139652 (Hartree/Particle)<br/>           Thermal correction to Energy= 0.147619<br/>           Thermal correction to Enthalpy= 0.148563<br/>           Thermal correction to Gibbs Free Energy= 0.106785<br/>           Sum of electronic and zero-point Energies= -477.123841<br/>           Sum of electronic and thermal Energies= -477.115874<br/>           Sum of electronic and thermal Enthalpies= -477.114930<br/>           Sum of electronic and thermal Free Energies= -477.156708</p>   | 6            | -2.461523000 | -0.370851000 | 0.000129000  |
|                                                                                                                                                                                                                                                                                                                                                                                                                                                                                                                                                                                                                                                                    | 6            | -1.818722000 | -1.649185000 | -0.000119000 |
|                                                                                                                                                                                                                                                                                                                                                                                                                                                                                                                                                                                                                                                                    | 6            | -0.483337000 | -1.928778000 | -0.000229000 |
|                                                                                                                                                                                                                                                                                                                                                                                                                                                                                                                                                                                                                                                                    | 6            | -1.960588000 | 0.898769000  | 0.000086000  |
|                                                                                                                                                                                                                                                                                                                                                                                                                                                                                                                                                                                                                                                                    | 6            | 0.592231000  | -0.996973000 | -0.000141000 |
|                                                                                                                                                                                                                                                                                                                                                                                                                                                                                                                                                                                                                                                                    | 6            | -0.583971000 | 1.372987000  | -0.000511000 |
|                                                                                                                                                                                                                                                                                                                                                                                                                                                                                                                                                                                                                                                                    | 6            | 0.510919000  | 0.411984000  | -0.000175000 |
|                                                                                                                                                                                                                                                                                                                                                                                                                                                                                                                                                                                                                                                                    | 1            | -3.547308000 | -0.427560000 | 0.000363000  |
|                                                                                                                                                                                                                                                                                                                                                                                                                                                                                                                                                                                                                                                                    | 1            | -2.491644000 | -2.500553000 | -0.000129000 |
|                                                                                                                                                                                                                                                                                                                                                                                                                                                                                                                                                                                                                                                                    | 1            | -0.197129000 | -2.976764000 | -0.000333000 |
| 1                                                                                                                                                                                                                                                                                                                                                                                                                                                                                                                                                                                                                                                                  | -2.674154000 | 1.716938000  | 0.000447000  |              |
| 6                                                                                                                                                                                                                                                                                                                                                                                                                                                                                                                                                                                                                                                                  | 1.987246000  | -1.321321000 | -0.000181000 |              |
| 1                                                                                                                                                                                                                                                                                                                                                                                                                                                                                                                                                                                                                                                                  | 2.411357000  | -2.313516000 | -0.000284000 |              |
| 6                                                                                                                                                                                                                                                                                                                                                                                                                                                                                                                                                                                                                                                                  | 2.687669000  | -0.140022000 | 0.000160000  |              |
| 7                                                                                                                                                                                                                                                                                                                                                                                                                                                                                                                                                                                                                                                                  | 1.787064000  | 0.891389000  | 0.000020000  |              |
| 1                                                                                                                                                                                                                                                                                                                                                                                                                                                                                                                                                                                                                                                                  | 1.969871000  | 1.886028000  | -0.000107000 |              |
| 8                                                                                                                                                                                                                                                                                                                                                                                                                                                                                                                                                                                                                                                                  | -0.318741000 | 2.583919000  | 0.000682000  |              |
| 1                                                                                                                                                                                                                                                                                                                                                                                                                                                                                                                                                                                                                                                                  | 3.749944000  | 0.044697000  | 0.000332000  |              |
|  <p style="text-align: center;"><b>8OH-AZ</b></p> <p>Zero-point correction= 0.139294 (Hartree/Particle)<br/>           Thermal correction to Energy= 0.147128<br/>           Thermal correction to Enthalpy= 0.148073<br/>           Thermal correction to Gibbs Free Energy= 0.106688<br/>           Sum of electronic and zero-point Energies= -477.111986<br/>           Sum of electronic and thermal Energies= -477.104151<br/>           Sum of electronic and thermal Enthalpies= -477.103207<br/>           Sum of electronic and thermal Free Energies= -477.144592</p> | 6            | -2.442428000 | -0.370090000 | 0.000090000  |
|                                                                                                                                                                                                                                                                                                                                                                                                                                                                                                                                                                                                                                                                    | 6            | -1.827869000 | -1.635336000 | 0.000155000  |
|                                                                                                                                                                                                                                                                                                                                                                                                                                                                                                                                                                                                                                                                    | 6            | -0.476721000 | -1.942711000 | 0.000134000  |
|                                                                                                                                                                                                                                                                                                                                                                                                                                                                                                                                                                                                                                                                    | 6            | -1.900986000 | 0.904510000  | -0.000022000 |
|                                                                                                                                                                                                                                                                                                                                                                                                                                                                                                                                                                                                                                                                    | 6            | 0.604568000  | -1.054092000 | 0.000048000  |
|                                                                                                                                                                                                                                                                                                                                                                                                                                                                                                                                                                                                                                                                    | 6            | -0.545758000 | 1.270302000  | -0.000086000 |
|                                                                                                                                                                                                                                                                                                                                                                                                                                                                                                                                                                                                                                                                    | 6            | 0.559308000  | 0.403752000  | -0.000052000 |
|                                                                                                                                                                                                                                                                                                                                                                                                                                                                                                                                                                                                                                                                    | 1            | -3.528490000 | -0.395871000 | 0.000118000  |
|                                                                                                                                                                                                                                                                                                                                                                                                                                                                                                                                                                                                                                                                    | 1            | -2.508629000 | -2.480328000 | 0.000196000  |
|                                                                                                                                                                                                                                                                                                                                                                                                                                                                                                                                                                                                                                                                    | 1            | -0.223210000 | -2.999812000 | 0.000125000  |
| 1                                                                                                                                                                                                                                                                                                                                                                                                                                                                                                                                                                                                                                                                  | -2.592741000 | 1.740099000  | -0.000079000 |              |
| 6                                                                                                                                                                                                                                                                                                                                                                                                                                                                                                                                                                                                                                                                  | 1.984790000  | -1.352532000 | -0.000303000 |              |
| 1                                                                                                                                                                                                                                                                                                                                                                                                                                                                                                                                                                                                                                                                  | 2.430979000  | -2.336045000 | -0.000563000 |              |
| 6                                                                                                                                                                                                                                                                                                                                                                                                                                                                                                                                                                                                                                                                  | 2.648229000  | -0.125879000 | 0.000506000  |              |
| 7                                                                                                                                                                                                                                                                                                                                                                                                                                                                                                                                                                                                                                                                  | 1.798144000  | 0.932158000  | -0.000212000 |              |
| 1                                                                                                                                                                                                                                                                                                                                                                                                                                                                                                                                                                                                                                                                  | 0.701677000  | 2.653984000  | -0.000271000 |              |
| 8                                                                                                                                                                                                                                                                                                                                                                                                                                                                                                                                                                                                                                                                  | -0.275452000 | 2.583574000  | -0.000187000 |              |
| 1                                                                                                                                                                                                                                                                                                                                                                                                                                                                                                                                                                                                                                                                  | 3.718224000  | 0.036734000  | 0.000633000  |              |
|  <p style="text-align: center;"><b>8OH-AZ-R</b></p> <p>Zero-point correction= 0.138328 (Hartree/Particle)<br/>           Thermal correction to Energy= 0.146479<br/>           Thermal correction to Enthalpy= 0.147423<br/>           Thermal correction to Gibbs Free Energy= 0.105422<br/>           Sum of electronic and zero-point Energies= -477.095210<br/>           Sum of electronic and thermal Energies= -477.087059</p>                                                                                                                                           | 6            | -2.385235000 | -0.590376000 | 0.000015000  |
|                                                                                                                                                                                                                                                                                                                                                                                                                                                                                                                                                                                                                                                                    | 6            | -1.674203000 | -1.796099000 | 0.000037000  |
|                                                                                                                                                                                                                                                                                                                                                                                                                                                                                                                                                                                                                                                                    | 6            | -0.298020000 | -1.967527000 | 0.000039000  |
|                                                                                                                                                                                                                                                                                                                                                                                                                                                                                                                                                                                                                                                                    | 6            | -1.934788000 | 0.721248000  | -0.000009000 |
|                                                                                                                                                                                                                                                                                                                                                                                                                                                                                                                                                                                                                                                                    | 6            | 0.695584000  | -0.986862000 | 0.000019000  |
|                                                                                                                                                                                                                                                                                                                                                                                                                                                                                                                                                                                                                                                                    | 6            | -0.623988000 | 1.233693000  | -0.000018000 |
|                                                                                                                                                                                                                                                                                                                                                                                                                                                                                                                                                                                                                                                                    | 6            | 0.566706000  | 0.485786000  | -0.000006000 |
|                                                                                                                                                                                                                                                                                                                                                                                                                                                                                                                                                                                                                                                                    | 1            | -3.466622000 | -0.693294000 | 0.000018000  |

|                                              |             |   |              |              |              |
|----------------------------------------------|-------------|---|--------------|--------------|--------------|
| Sum of electronic and thermal Free Energies= | -477.128116 | 1 | -2.274882000 | -2.699498000 | 0.000062000  |
|                                              |             | 1 | 0.057928000  | -2.994857000 | 0.000077000  |
|                                              |             | 1 | -2.717579000 | 1.477628000  | -0.000027000 |
|                                              |             | 6 | 2.086833000  | -1.206492000 | 0.000090000  |
|                                              |             | 1 | 2.584433000  | -2.165173000 | 0.000166000  |
|                                              |             | 6 | 2.676048000  | 0.057058000  | -0.000056000 |
|                                              |             | 7 | 1.776326000  | 1.069764000  | -0.000038000 |
|                                              |             | 1 | -1.320609000 | 3.010211000  | -0.000083000 |
|                                              |             | 8 | -0.460817000 | 2.574338000  | -0.000067000 |
|                                              |             | 1 | 3.735955000  | 0.279366000  | -0.000074000 |

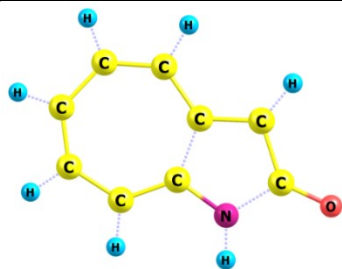

2O-AZ

|                                              |                             |
|----------------------------------------------|-----------------------------|
| Zero-point correction=                       | 0.138920 (Hartree/Particle) |
| Thermal correction to Energy=                | 0.147035                    |
| Thermal correction to Enthalpy=              | 0.147979                    |
| Thermal correction to Gibbs Free Energy=     | 0.105949                    |
| Sum of electronic and zero-point Energies=   | -477.122933                 |
| Sum of electronic and thermal Energies=      | -477.114818                 |
| Sum of electronic and thermal Enthalpies=    | -477.113874                 |
| Sum of electronic and thermal Free Energies= | -477.155904                 |

|   |              |              |              |
|---|--------------|--------------|--------------|
| 6 | 2.899188000  | -0.064146000 | 0.000003000  |
| 6 | 2.319869000  | 1.232901000  | 0.000037000  |
| 6 | 1.000777000  | 1.604478000  | 0.000043000  |
| 6 | 2.266934000  | -1.283785000 | -0.000031000 |
| 6 | -0.164795000 | 0.785805000  | 0.000011000  |
| 6 | 0.882379000  | -1.577917000 | -0.000041000 |
| 6 | -0.166578000 | -0.692083000 | -0.000027000 |
| 1 | 3.984097000  | -0.089087000 | 0.000007000  |
| 1 | 3.033219000  | 2.051980000  | 0.000065000  |
| 1 | 0.801269000  | 2.672277000  | 0.000078000  |
| 1 | 2.915720000  | -2.154535000 | -0.000050000 |
| 6 | -1.471870000 | 1.208674000  | 0.000044000  |
| 1 | -1.825890000 | 2.227766000  | 0.000111000  |
| 6 | -2.360766000 | 0.062508000  | -0.000055000 |
| 7 | -1.478867000 | -1.058624000 | -0.000028000 |
| 1 | 0.619143000  | -2.632050000 | -0.000066000 |
| 1 | -1.822155000 | -2.007701000 | -0.000030000 |
| 8 | -3.573020000 | -0.039612000 | 0.000023000  |

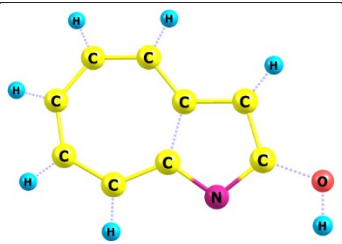

2OH-AZ

|                                              |                             |
|----------------------------------------------|-----------------------------|
| Zero-point correction=                       | 0.138975 (Hartree/Particle) |
| Thermal correction to Energy=                | 0.146980                    |
| Thermal correction to Enthalpy=              | 0.147925                    |
| Thermal correction to Gibbs Free Energy=     | 0.106208                    |
| Sum of electronic and zero-point Energies=   | -477.111947                 |
| Sum of electronic and thermal Energies=      | -477.103941                 |
| Sum of electronic and thermal Enthalpies=    | -477.102997                 |
| Sum of electronic and thermal Free Energies= | -477.144714                 |

|   |              |              |              |
|---|--------------|--------------|--------------|
| 6 | 2.900812000  | -0.094564000 | -0.000002000 |
| 6 | 2.362420000  | 1.201190000  | 0.000035000  |
| 6 | 1.034212000  | 1.598961000  | 0.000045000  |
| 6 | 2.246117000  | -1.319919000 | -0.000037000 |
| 6 | -0.116066000 | 0.798744000  | 0.000022000  |
| 6 | 0.873204000  | -1.591053000 | -0.000045000 |
| 6 | -0.180082000 | -0.689327000 | -0.000020000 |
| 1 | 3.985655000  | -0.144855000 | -0.000002000 |
| 1 | 3.091061000  | 2.006389000  | 0.000058000  |
| 1 | 0.857744000  | 2.671571000  | 0.000076000  |
| 1 | 2.890342000  | -2.194038000 | -0.000061000 |
| 6 | -1.447131000 | 1.215551000  | 0.000036000  |
| 1 | -1.828929000 | 2.224362000  | 0.000066000  |
| 6 | -2.200876000 | 0.028010000  | -0.000001000 |
| 7 | -1.471046000 | -1.096268000 | -0.000032000 |
| 1 | 0.574547000  | -2.634937000 | -0.000075000 |
| 1 | -3.790714000 | -0.957247000 | -0.000029000 |
| 8 | -3.539755000 | -0.022868000 | -0.000001000 |

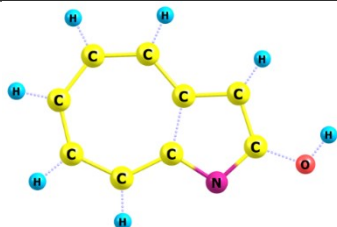

2OH-AZ-R

|   |             |              |              |
|---|-------------|--------------|--------------|
| 6 | 2.903958000 | -0.054734000 | -0.000005000 |
| 6 | 2.344286000 | 1.229877000  | 0.000037000  |

|                                              |                             |    |              |              |              |
|----------------------------------------------|-----------------------------|----|--------------|--------------|--------------|
| Zero-point correction=                       | 0.138650 (Hartree/Particle) | 6  | 1.007517000  | 1.604581000  | 0.000050000  |
| Thermal correction to Energy=                | 0.146757                    | 6  | 2.269763000  | -1.292933000 | -0.000045000 |
| Thermal correction to Enthalpy=              | 0.147701                    | 6  | -0.125500000 | 0.783824000  | 0.000025000  |
| Thermal correction to Gibbs Free Energy=     | 0.105811                    | 6  | 0.903950000  | -1.588147000 | -0.000054000 |
| Sum of electronic and zero-point Energies=   | -477.105109                 | 6  | -0.167714000 | -0.704494000 | -0.000026000 |
| Sum of electronic and thermal Energies=      | -477.097002                 | 1  | 3.989510000  | -0.086883000 | -0.000006000 |
| Sum of electronic and thermal Enthalpies=    | -477.096058                 | 1  | 3.058411000  | 2.048001000  | 0.000061000  |
| Sum of electronic and thermal Free Energies= | -477.137948                 | 1  | 0.813336000  | 2.674278000  | 0.000079000  |
|                                              |                             | 1  | 2.929913000  | -2.155103000 | -0.000071000 |
|                                              |                             | 6  | -1.466756000 | 1.170827000  | 0.000022000  |
|                                              |                             | 1  | -1.857375000 | 2.178292000  | 0.000039000  |
|                                              |                             | 6  | -2.199665000 | -0.035773000 | 0.000009000  |
|                                              |                             | 7  | -1.445756000 | -1.140190000 | -0.000022000 |
|                                              |                             | 1  | 0.621155000  | -2.636333000 | -0.000082000 |
|                                              |                             | 1  | -3.953231000 | 0.692555000  | 0.000017000  |
|                                              |                             | 8  | -3.537559000 | -0.176455000 | 0.000004000  |
|                                              |                             | 6  | -0.011439000 | 2.534905000  | 0.000093000  |
|                                              |                             | 6  | 1.390280000  | 2.288101000  | 0.000083000  |
|                                              |                             | 6  | 2.031273000  | 1.081083000  | 0.000038000  |
|                                              |                             | 6  | -1.085236000 | 1.680887000  | 0.000064000  |
|                                              |                             | 6  | 1.436423000  | -0.206598000 | -0.000008000 |
|                                              |                             | 6  | -1.153767000 | 0.246180000  | 0.000016000  |
|                                              |                             | 6  | 0.052065000  | -0.538804000 | -0.000016000 |
|                                              |                             | 1  | -0.277907000 | 3.588487000  | 0.000131000  |
|                                              |                             | 1  | 2.018723000  | 3.172823000  | 0.000115000  |
|                                              |                             | 1  | 3.117403000  | 1.095592000  | 0.000040000  |
|                                              |                             | 1  | -2.063009000 | 2.150245000  | 0.000080000  |
|                                              |                             | 6  | 2.153992000  | -1.443051000 | -0.000045000 |
|                                              |                             | 1  | 3.227087000  | -1.555367000 | -0.000043000 |
|                                              |                             | 6  | 1.229161000  | -2.457470000 | -0.000095000 |
|                                              |                             | 7  | -0.019393000 | -1.900371000 | -0.000075000 |
|                                              |                             | 1  | -0.924241000 | -2.361966000 | -0.000096000 |
|                                              |                             | 16 | -2.661280000 | -0.523190000 | -0.000021000 |
|                                              |                             | 1  | 1.361667000  | -3.527567000 | -0.000138000 |
|                                              |                             | 6  | -0.263853000 | 2.516250000  | -0.000066000 |
|                                              |                             | 6  | -1.615259000 | 2.139960000  | 0.000092000  |
|                                              |                             | 6  | -2.144755000 | 0.860344000  | 0.000183000  |
|                                              |                             | 6  | 0.889391000  | 1.746474000  | -0.000187000 |
|                                              |                             | 6  | -1.457927000 | -0.356992000 | 0.000127000  |
|                                              |                             | 6  | 1.037461000  | 0.346958000  | -0.000213000 |
|                                              |                             | 6  | -0.003820000 | -0.600595000 | -0.000089000 |
|                                              |                             | 1  | -0.087830000 | 3.588329000  | -0.000115000 |
|                                              |                             | 1  | -2.330201000 | 2.956287000  | 0.000101000  |
|                                              |                             | 1  | -3.229420000 | 0.787395000  | 0.000183000  |
|                                              |                             | 1  | 1.818814000  | 2.308012000  | -0.000263000 |
|                                              |                             | 6  | -2.029376000 | -1.645024000 | -0.000181000 |
|                                              |                             | 1  | -3.083570000 | -1.880140000 | -0.000388000 |
|                                              |                             | 6  | -0.263853000 | 2.516250000  | -0.000066000 |
|                                              |                             | 6  | -1.615259000 | 2.139960000  | 0.000092000  |
|                                              |                             | 6  | -2.144755000 | 0.860344000  | 0.000183000  |
|                                              |                             | 6  | 0.889391000  | 1.746474000  | -0.000187000 |
|                                              |                             | 6  | -1.457927000 | -0.356992000 | 0.000127000  |
|                                              |                             | 6  | 1.037461000  | 0.346958000  | -0.000213000 |
|                                              |                             | 6  | -0.003820000 | -0.600595000 | -0.000089000 |
|                                              |                             | 1  | -0.087830000 | 3.588329000  | -0.000115000 |
|                                              |                             | 1  | -2.330201000 | 2.956287000  | 0.000101000  |
|                                              |                             | 1  | -3.229420000 | 0.787395000  | 0.000183000  |
|                                              |                             | 1  | 1.818814000  | 2.308012000  | -0.000263000 |
|                                              |                             | 6  | -2.029376000 | -1.645024000 | -0.000181000 |
|                                              |                             | 1  | -3.083570000 | -1.880140000 | -0.000388000 |

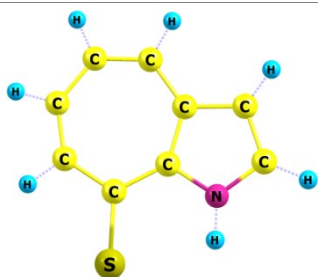

8S-AZ

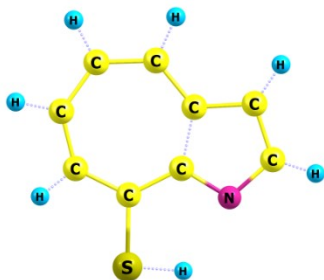

8SH-AZ

|                                                                                                                                                                                                                                                                                                                                                                                                                                                                                                                                                                                               |  |    |              |              |              |
|-----------------------------------------------------------------------------------------------------------------------------------------------------------------------------------------------------------------------------------------------------------------------------------------------------------------------------------------------------------------------------------------------------------------------------------------------------------------------------------------------------------------------------------------------------------------------------------------------|--|----|--------------|--------------|--------------|
|                                                                                                                                                                                                                                                                                                                                                                                                                                                                                                                                                                                               |  | 6  | -0.962221000 | -2.540736000 | 0.000243000  |
|                                                                                                                                                                                                                                                                                                                                                                                                                                                                                                                                                                                               |  | 7  | 0.244200000  | -1.924684000 | 0.000228000  |
|                                                                                                                                                                                                                                                                                                                                                                                                                                                                                                                                                                                               |  | 1  | 2.317012000  | -1.547501000 | 0.000458000  |
|                                                                                                                                                                                                                                                                                                                                                                                                                                                                                                                                                                                               |  | 16 | 2.700345000  | -0.244850000 | -0.000084000 |
|                                                                                                                                                                                                                                                                                                                                                                                                                                                                                                                                                                                               |  | 1  | -1.017569000 | -3.621823000 | 0.000316000  |
| 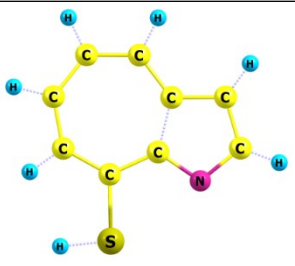 <p style="text-align: center;"><b>8SH-AZ-R</b></p> <p>Zero-point correction= 0.133230 (Hartree/Particle)<br/> Thermal correction to Energy= 0.141927<br/> Thermal correction to Enthalpy= 0.142871<br/> Thermal correction to Gibbs Free Energy= 0.099303<br/> Sum of electronic and zero-point Energies= -800.070555<br/> Sum of electronic and thermal Energies= -800.061859<br/> Sum of electronic and thermal Enthalpies= -800.060915<br/> Sum of electronic and thermal Free Energies= -800.104483</p> |  | 6  | 0.258405000  | 2.509864000  | 0.000045000  |
|                                                                                                                                                                                                                                                                                                                                                                                                                                                                                                                                                                                               |  | 6  | 1.611016000  | 2.144017000  | 0.000084000  |
|                                                                                                                                                                                                                                                                                                                                                                                                                                                                                                                                                                                               |  | 6  | 2.151051000  | 0.866980000  | 0.000078000  |
|                                                                                                                                                                                                                                                                                                                                                                                                                                                                                                                                                                                               |  | 6  | -0.895035000 | 1.736327000  | -0.000010000 |
|                                                                                                                                                                                                                                                                                                                                                                                                                                                                                                                                                                                               |  | 6  | 1.470198000  | -0.351334000 | 0.000033000  |
|                                                                                                                                                                                                                                                                                                                                                                                                                                                                                                                                                                                               |  | 6  | -1.034395000 | 0.336597000  | -0.000050000 |
|                                                                                                                                                                                                                                                                                                                                                                                                                                                                                                                                                                                               |  | 6  | 0.013298000  | -0.597743000 | -0.000032000 |
|                                                                                                                                                                                                                                                                                                                                                                                                                                                                                                                                                                                               |  | 1  | 0.075728000  | 3.580934000  | 0.000064000  |
|                                                                                                                                                                                                                                                                                                                                                                                                                                                                                                                                                                                               |  | 1  | 2.319684000  | 2.965768000  | 0.000118000  |
|                                                                                                                                                                                                                                                                                                                                                                                                                                                                                                                                                                                               |  | 1  | 3.236238000  | 0.801936000  | 0.000095000  |
|                                                                                                                                                                                                                                                                                                                                                                                                                                                                                                                                                                                               |  | 1  | -1.819933000 | 2.303518000  | -0.000013000 |
|                                                                                                                                                                                                                                                                                                                                                                                                                                                                                                                                                                                               |  | 6  | 2.037755000  | -1.639806000 | -0.000023000 |
|                                                                                                                                                                                                                                                                                                                                                                                                                                                                                                                                                                                               |  | 1  | 3.091270000  | -1.877787000 | -0.000037000 |
|                                                                                                                                                                                                                                                                                                                                                                                                                                                                                                                                                                                               |  | 6  | 0.966234000  | -2.533541000 | -0.000016000 |
|                                                                                                                                                                                                                                                                                                                                                                                                                                                                                                                                                                                               |  | 7  | -0.239640000 | -1.918126000 | 0.000015000  |
|                                                                                                                                                                                                                                                                                                                                                                                                                                                                                                                                                                                               |  | 1  | -3.317047000 | 0.778071000  | 0.000037000  |
|                                                                                                                                                                                                                                                                                                                                                                                                                                                                                                                                                                                               |  | 16 | -2.650054000 | -0.396176000 | -0.000062000 |
|                                                                                                                                                                                                                                                                                                                                                                                                                                                                                                                                                                                               |  | 1  | 1.021250000  | -3.614900000 | -0.000026000 |
|  <p style="text-align: center;"><b>2S-AZ</b></p> <p>Zero-point correction= 0.137051 (Hartree/Particle)<br/> Thermal correction to Energy= 0.145504<br/> Thermal correction to Enthalpy= 0.146448<br/> Thermal correction to Gibbs Free Energy= 0.103199<br/> Sum of electronic and zero-point Energies= -800.087182<br/> Sum of electronic and thermal Energies= -800.078730<br/> Sum of electronic and thermal Enthalpies= -800.077786<br/> Sum of electronic and thermal Free Energies= -800.121035</p>   |  | 6  | -3.315013000 | -0.084098000 | 0.000021000  |
|                                                                                                                                                                                                                                                                                                                                                                                                                                                                                                                                                                                               |  | 6  | -2.752414000 | 1.219535000  | -0.000033000 |
|                                                                                                                                                                                                                                                                                                                                                                                                                                                                                                                                                                                               |  | 6  | -1.436273000 | 1.605358000  | -0.000058000 |
|                                                                                                                                                                                                                                                                                                                                                                                                                                                                                                                                                                                               |  | 6  | -2.672019000 | -1.301268000 | 0.000072000  |
|                                                                                                                                                                                                                                                                                                                                                                                                                                                                                                                                                                                               |  | 6  | -0.268863000 | 0.792212000  | -0.000063000 |
|                                                                                                                                                                                                                                                                                                                                                                                                                                                                                                                                                                                               |  | 6  | -1.288416000 | -1.583356000 | 0.000076000  |
|                                                                                                                                                                                                                                                                                                                                                                                                                                                                                                                                                                                               |  | 6  | -0.252011000 | -0.676708000 | 0.000002000  |
|                                                                                                                                                                                                                                                                                                                                                                                                                                                                                                                                                                                               |  | 1  | -4.399561000 | -0.120737000 | 0.000043000  |
|                                                                                                                                                                                                                                                                                                                                                                                                                                                                                                                                                                                               |  | 1  | -3.475746000 | 2.029562000  | -0.000034000 |
|                                                                                                                                                                                                                                                                                                                                                                                                                                                                                                                                                                                               |  | 1  | -1.245419000 | 2.674616000  | -0.000058000 |
|                                                                                                                                                                                                                                                                                                                                                                                                                                                                                                                                                                                               |  | 1  | -3.315149000 | -2.176062000 | 0.000127000  |
|                                                                                                                                                                                                                                                                                                                                                                                                                                                                                                                                                                                               |  | 6  | 1.045755000  | 1.216074000  | 0.000057000  |
|                                                                                                                                                                                                                                                                                                                                                                                                                                                                                                                                                                                               |  | 1  | 1.395670000  | 2.236200000  | 0.000228000  |
|                                                                                                                                                                                                                                                                                                                                                                                                                                                                                                                                                                                               |  | 6  | 1.919371000  | 0.085765000  | -0.000281000 |
|                                                                                                                                                                                                                                                                                                                                                                                                                                                                                                                                                                                               |  | 7  | 1.066291000  | -1.023337000 | 0.000071000  |
|                                                                                                                                                                                                                                                                                                                                                                                                                                                                                                                                                                                               |  | 1  | -1.011043000 | -2.633573000 | 0.000135000  |
|                                                                                                                                                                                                                                                                                                                                                                                                                                                                                                                                                                                               |  | 1  | 1.425877000  | -1.966913000 | 0.000237000  |
|                                                                                                                                                                                                                                                                                                                                                                                                                                                                                                                                                                                               |  | 16 | 3.580040000  | -0.032551000 | 0.000005000  |
|  <p style="text-align: center;"><b>2SH-AZ</b></p> <p>Zero-point correction= 0.133171 (Hartree/Particle)<br/> Thermal correction to Energy= 0.141919<br/> Thermal correction to Enthalpy= 0.142863<br/> Thermal correction to Gibbs Free Energy= 0.099148</p>                                                                                                                                                                                                                                               |  | 6  | 3.319563000  | -0.112243000 | -0.000001000 |
|                                                                                                                                                                                                                                                                                                                                                                                                                                                                                                                                                                                               |  | 6  | 2.795143000  | 1.187645000  | 0.000033000  |
|                                                                                                                                                                                                                                                                                                                                                                                                                                                                                                                                                                                               |  | 6  | 1.468862000  | 1.596871000  | 0.000044000  |
|                                                                                                                                                                                                                                                                                                                                                                                                                                                                                                                                                                                               |  | 6  | 2.654710000  | -1.334804000 | -0.000034000 |
|                                                                                                                                                                                                                                                                                                                                                                                                                                                                                                                                                                                               |  | 6  | 0.315026000  | 0.804302000  | 0.000023000  |
|                                                                                                                                                                                                                                                                                                                                                                                                                                                                                                                                                                                               |  | 6  | 1.282016000  | -1.593722000 | -0.000041000 |
|                                                                                                                                                                                                                                                                                                                                                                                                                                                                                                                                                                                               |  | 6  | 0.235536000  | -0.678989000 | -0.000017000 |

|                                              |             |    |              |              |              |
|----------------------------------------------|-------------|----|--------------|--------------|--------------|
| Sum of electronic and thermal Energies=      | -800.068982 | 1  | 4.403945000  | -0.172757000 | -0.000003000 |
| Sum of electronic and thermal Enthalpies=    | -800.068038 | 1  | 3.531243000  | 1.985891000  | 0.000056000  |
| Sum of electronic and thermal Free Energies= | -800.111753 | 1  | 1.301164000  | 2.670940000  | 0.000075000  |
|                                              |             | 1  | 3.293069000  | -2.213138000 | -0.000058000 |
|                                              |             | 6  | -1.015095000 | 1.230202000  | 0.000043000  |
|                                              |             | 1  | -1.375400000 | 2.247740000  | 0.000079000  |
|                                              |             | 6  | -1.787888000 | 0.052765000  | -0.000007000 |
|                                              |             | 7  | -1.055006000 | -1.078916000 | -0.000027000 |
|                                              |             | 1  | 0.971331000  | -2.634045000 | -0.000070000 |
|                                              |             | 1  | -3.615247000 | -1.340636000 | -0.000045000 |
|                                              |             | 16 | -3.545768000 | 0.006015000  | -0.000006000 |
|                                              |             | 6  | -3.321259000 | -0.094773000 | 0.000008000  |
|                                              |             | 6  | -2.787171000 | 1.200753000  | -0.000036000 |
|                                              |             | 6  | -1.457483000 | 1.600139000  | -0.000050000 |
|                                              |             | 6  | -2.665750000 | -1.322770000 | 0.000051000  |
|                                              |             | 6  | -0.310218000 | 0.798856000  | -0.000024000 |
|                                              |             | 6  | -1.295453000 | -1.592048000 | 0.000061000  |
|                                              |             | 6  | -0.241737000 | -0.685210000 | 0.000030000  |
|                                              |             | 1  | -4.406081000 | -0.146946000 | 0.000011000  |
|                                              |             | 1  | -3.517187000 | 2.004582000  | -0.000059000 |
|                                              |             | 1  | -1.282327000 | 2.673073000  | -0.000077000 |
|                                              |             | 1  | -3.310929000 | -2.196073000 | 0.000080000  |
|                                              |             | 6  | 1.023614000  | 1.214077000  | -0.000005000 |
|                                              |             | 1  | 1.389651000  | 2.229686000  | -0.000006000 |
|                                              |             | 6  | 1.786287000  | 0.029180000  | -0.000031000 |
|                                              |             | 7  | 1.044582000  | -1.094646000 | 0.000035000  |
|                                              |             | 1  | -0.991728000 | -2.634404000 | 0.000093000  |
|                                              |             | 1  | 3.812111000  | 1.174798000  | -0.000005000 |
|                                              |             | 16 | 3.538090000  | -0.145713000 | -0.000019000 |
|                                              |             | 6  | -2.459575000 | -0.187896000 | 0.000005000  |
|                                              |             | 6  | -1.921442000 | -1.502583000 | 0.000044000  |
|                                              |             | 6  | -0.607036000 | -1.932835000 | 0.000058000  |
|                                              |             | 6  | -1.878174000 | 1.066941000  | -0.000033000 |
|                                              |             | 6  | 0.536326000  | -1.112699000 | 0.000034000  |
|                                              |             | 6  | -0.488880000 | 1.334678000  | -0.000041000 |
|                                              |             | 6  | 0.494266000  | 0.303230000  | -0.000010000 |
|                                              |             | 1  | -3.546421000 | -0.170000000 | 0.000004000  |
|                                              |             | 1  | -2.670053000 | -2.288287000 | 0.000068000  |
|                                              |             | 1  | -0.446291000 | -3.007469000 | 0.000090000  |
|                                              |             | 1  | -2.532961000 | 1.931486000  | -0.000059000 |
|                                              |             | 6  | 1.932910000  | -1.417987000 | 0.000045000  |
|                                              |             | 1  | 2.379757000  | -2.401134000 | 0.000075000  |
|                                              |             | 6  | 2.612346000  | -0.206377000 | 0.000008000  |
|                                              |             | 7  | 1.725519000  | 0.835572000  | -0.000025000 |
|                                              |             | 1  | 1.263950000  | 2.036549000  | -0.000061000 |
|                                              |             | 8  | 0.058798000  | 2.502227000  | -0.000075000 |
|                                              |             | 1  | 3.678562000  | -0.034791000 | 0.000004000  |
|                                              |             | 6  | -2.403514000 | -0.546680000 | 0.013146000  |
|                                              |             |    |              |              |              |

  

|                                                                                   |                             |  |  |  |  |
|-----------------------------------------------------------------------------------|-----------------------------|--|--|--|--|
| 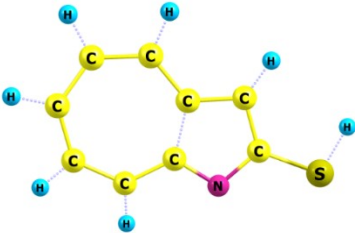 |                             |  |  |  |  |
| <b>2SH-AZ-R</b>                                                                   |                             |  |  |  |  |
| Zero-point correction=                                                            | 0.133205 (Hartree/Particle) |  |  |  |  |
| Thermal correction to Energy=                                                     | 0.141971                    |  |  |  |  |
| Thermal correction to Enthalpy=                                                   | 0.142916                    |  |  |  |  |
| Thermal correction to Gibbs Free Energy=                                          | 0.099146                    |  |  |  |  |
| Sum of electronic and zero-point Energies=                                        | -800.075898                 |  |  |  |  |
| Sum of electronic and thermal Energies=                                           | -800.067132                 |  |  |  |  |
| Sum of electronic and thermal Enthalpies=                                         | -800.066188                 |  |  |  |  |
| Sum of electronic and thermal Free Energies=                                      | -800.109957                 |  |  |  |  |

  

|                                                                                     |                             |  |  |  |  |
|-------------------------------------------------------------------------------------|-----------------------------|--|--|--|--|
|  |                             |  |  |  |  |
| <b>TS11</b>                                                                         |                             |  |  |  |  |
| Zero-point correction=                                                              | 0.135162 (Hartree/Particle) |  |  |  |  |
| Thermal correction to Energy=                                                       | 0.142607                    |  |  |  |  |
| Thermal correction to Enthalpy=                                                     | 0.143551                    |  |  |  |  |
| Thermal correction to Gibbs Free Energy=                                            | 0.102852                    |  |  |  |  |
| Sum of electronic and zero-point Energies=                                          | -477.096318                 |  |  |  |  |
| Sum of electronic and thermal Energies=                                             | -477.088873                 |  |  |  |  |
| Sum of electronic and thermal Enthalpies=                                           | -477.087929                 |  |  |  |  |
| Sum of electronic and thermal Free Energies=                                        | -477.128628                 |  |  |  |  |

  

|                                                                                     |  |  |  |  |  |
|-------------------------------------------------------------------------------------|--|--|--|--|--|
|  |  |  |  |  |  |
|                                                                                     |  |  |  |  |  |



|                                                                                                                                               |                             |   |              |              |              |
|-----------------------------------------------------------------------------------------------------------------------------------------------|-----------------------------|---|--------------|--------------|--------------|
| Zero-point correction=                                                                                                                        | 0.137191 (Hartree/Particle) | 6 | -1.711681000 | -1.762929000 | 0.012154000  |
| Thermal correction to Energy=                                                                                                                 | 0.145007                    | 6 | -0.338583000 | -1.964855000 | -0.003887000 |
| Thermal correction to Enthalpy=                                                                                                               | 0.145951                    | 6 | -1.924818000 | 0.757253000  | -0.005380000 |
| Thermal correction to Gibbs Free Energy=                                                                                                      | 0.104490                    | 6 | 0.676387000  | -1.007098000 | -0.012961000 |
| Sum of electronic and zero-point Energies=                                                                                                    | -477.089138                 | 6 | -0.606201000 | 1.236999000  | -0.010562000 |
| Sum of electronic and thermal Energies=                                                                                                       | -477.081323                 | 6 | 0.568852000  | 0.475040000  | -0.006792000 |
| Sum of electronic and thermal Enthalpies=                                                                                                     | -477.080378                 | 1 | -3.486364000 | -0.631857000 | 0.017502000  |
| Sum of electronic and thermal Free Energies=                                                                                                  | -477.121840                 | 1 | -2.327638000 | -2.656330000 | 0.021295000  |
|                                                                                                                                               |                             | 1 | -0.006296000 | -3.000083000 | -0.003874000 |
|                                                                                                                                               |                             | 1 | -2.674616000 | 1.541651000  | -0.034751000 |
|                                                                                                                                               |                             | 6 | 2.059671000  | -1.249460000 | -0.004459000 |
|                                                                                                                                               |                             | 1 | 2.543675000  | -2.215099000 | -0.005631000 |
|                                                                                                                                               |                             | 6 | 2.670023000  | 0.007426000  | 0.012262000  |
|                                                                                                                                               |                             | 7 | 1.793055000  | 1.035847000  | 0.012112000  |
|                                                                                                                                               |                             | 1 | -0.609052000 | 3.021534000  | 0.750744000  |
|                                                                                                                                               |                             | 8 | -0.458287000 | 2.600812000  | -0.102328000 |
|                                                                                                                                               |                             | 1 | 3.734389000  | 0.208585000  | 0.027417000  |
|                                                                                                                                               |                             | 6 | 2.886178000  | -0.147909000 | -0.000002000 |
|                                                                                                                                               |                             | 6 | 2.369526000  | 1.158721000  | 0.000034000  |
|                                                                                                                                               |                             | 6 | 1.054699000  | 1.589989000  | 0.000045000  |
|                                                                                                                                               |                             | 6 | 2.201629000  | -1.354386000 | -0.000037000 |
|                                                                                                                                               |                             | 6 | -0.127547000 | 0.827490000  | 0.000023000  |
|                                                                                                                                               |                             | 6 | 0.822429000  | -1.594341000 | -0.000045000 |
|                                                                                                                                               |                             | 6 | -0.203939000 | -0.664117000 | -0.000019000 |
|                                                                                                                                               |                             | 1 | 3.969149000  | -0.220704000 | -0.000003000 |
|                                                                                                                                               |                             | 1 | 3.114886000  | 1.948667000  | 0.000057000  |
|                                                                                                                                               |                             | 1 | 0.906276000  | 2.666363000  | 0.000075000  |
|                                                                                                                                               |                             | 1 | 2.822385000  | -2.245375000 | -0.000062000 |
|                                                                                                                                               |                             | 6 | -1.438889000 | 1.316720000  | 0.000036000  |
|                                                                                                                                               |                             | 1 | -1.748310000 | 2.349110000  | 0.000066000  |
|                                                                                                                                               |                             | 6 | -2.267665000 | 0.175832000  | 0.000004000  |
|                                                                                                                                               |                             | 7 | -1.518006000 | -0.969225000 | -0.000029000 |
|                                                                                                                                               |                             | 1 | 0.505137000  | -2.632499000 | -0.000075000 |
|                                                                                                                                               |                             | 1 | -2.756084000 | -1.364376000 | -0.000040000 |
|                                                                                                                                               |                             | 8 | -3.495740000 | -0.195576000 | -0.000007000 |
|                                                                                                                                               |                             | 6 | -2.903198000 | -0.067609000 | 0.010244000  |
|                                                                                                                                               |                             | 6 | -2.353582000 | 1.221805000  | 0.004760000  |
|                                                                                                                                               |                             | 6 | -1.018661000 | 1.603656000  | -0.001174000 |
|                                                                                                                                               |                             | 6 | -2.265359000 | -1.303632000 | 0.007974000  |
|                                                                                                                                               |                             | 6 | 0.117593000  | 0.788767000  | -0.002844000 |
|                                                                                                                                               |                             | 6 | -0.896821000 | -1.590064000 | -0.001442000 |
|                                                                                                                                               |                             | 6 | 0.166861000  | -0.699263000 | -0.006102000 |
|                                                                                                                                               |                             | 1 | -3.988738000 | -0.105503000 | 0.015836000  |
|                                                                                                                                               |                             | 1 | -3.073772000 | 2.034341000  | 0.005704000  |
|                                                                                                                                               |                             | 1 | -0.829482000 | 2.674288000  | -0.003931000 |
|                                                                                                                                               |                             | 1 | -2.921604000 | -2.168526000 | 0.011639000  |
|                                                                                                                                               |                             | 6 | 1.458124000  | 1.181090000  | -0.010401000 |
|                                                                                                                                               |                             | 1 | 1.854457000  | 2.184925000  | -0.028729000 |
| 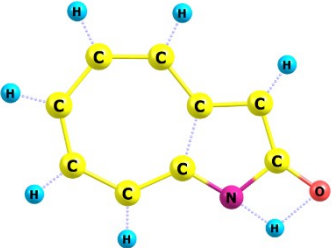 <p style="text-align: center;"><b>TS<sub>12</sub></b></p>  |                             |   |              |              |              |
| Zero-point correction=                                                                                                                        | 0.133660 (Hartree/Particle) |   |              |              |              |
| Thermal correction to Energy=                                                                                                                 | 0.141500                    |   |              |              |              |
| Thermal correction to Enthalpy=                                                                                                               | 0.142444                    |   |              |              |              |
| Thermal correction to Gibbs Free Energy=                                                                                                      | 0.100834                    |   |              |              |              |
| Sum of electronic and zero-point Energies=                                                                                                    | -477.052575                 |   |              |              |              |
| Sum of electronic and thermal Energies=                                                                                                       | -477.044735                 |   |              |              |              |
| Sum of electronic and thermal Enthalpies=                                                                                                     | -477.043791                 |   |              |              |              |
| Sum of electronic and thermal Free Energies=                                                                                                  | -477.085401                 |   |              |              |              |
|  <p style="text-align: center;"><b>TS<sub>R2</sub></b></p> |                             |   |              |              |              |
| Zero-point correction=                                                                                                                        | 0.137435 (Hartree/Particle) |   |              |              |              |
| Thermal correction to Energy=                                                                                                                 | 0.145234                    |   |              |              |              |
| Thermal correction to Enthalpy=                                                                                                               | 0.146178                    |   |              |              |              |
| Thermal correction to Gibbs Free Energy=                                                                                                      | 0.104735                    |   |              |              |              |
| Sum of electronic and zero-point Energies=                                                                                                    | -477.098565                 |   |              |              |              |
| Sum of electronic and thermal Energies=                                                                                                       | -477.090767                 |   |              |              |              |
| Sum of electronic and thermal Enthalpies=                                                                                                     | -477.089822                 |   |              |              |              |
| Sum of electronic and thermal Free Energies=                                                                                                  | -477.131266                 |   |              |              |              |



|                                              |                                                                                     |    |              |              |              |
|----------------------------------------------|-------------------------------------------------------------------------------------|----|--------------|--------------|--------------|
|                                              |                                                                                     | 6  | 2.198085000  | -0.015711000 | -0.012592000 |
|                                              |                                                                                     | 7  | 1.449956000  | -1.126768000 | -0.012702000 |
|                                              |                                                                                     | 1  | -0.607320000 | -2.636590000 | -0.006574000 |
|                                              |                                                                                     | 1  | 3.944605000  | -0.003893000 | 0.796993000  |
|                                              |                                                                                     | 8  | 3.556738000  | -0.100738000 | -0.079071000 |
|                                              |                                                                                     | 6  | 1.059520000  | -2.322118000 | 0.000011000  |
|                                              |                                                                                     | 6  | 2.215349000  | -1.512850000 | 0.000032000  |
|                                              |                                                                                     | 6  | 2.313338000  | -0.133507000 | 0.000047000  |
|                                              |                                                                                     | 6  | -0.288668000 | -2.002625000 | -0.000011000 |
|                                              |                                                                                     | 6  | 1.258543000  | 0.790909000  | 0.000041000  |
|                                              |                                                                                     | 6  | -0.885731000 | -0.726017000 | -0.000024000 |
|                                              |                                                                                     | 6  | -0.150422000 | 0.488749000  | 0.000003000  |
|                                              |                                                                                     | 1  | 1.264545000  | -3.389363000 | 0.000013000  |
|                                              |                                                                                     | 1  | 3.155209000  | -2.055510000 | 0.000039000  |
|                                              |                                                                                     | 1  | 3.317240000  | 0.282671000  | 0.000065000  |
|                                              |                                                                                     | 1  | -0.977364000 | -2.840902000 | -0.000024000 |
|                                              |                                                                                     | 6  | 1.325510000  | 2.211616000  | 0.000052000  |
|                                              |                                                                                     | 1  | 2.222398000  | 2.813376000  | 0.000082000  |
|                                              |                                                                                     | 6  | 0.016541000  | 2.670597000  | 0.000022000  |
|                                              |                                                                                     | 7  | -0.863801000 | 1.628634000  | -0.000008000 |
|                                              |                                                                                     | 1  | -2.131052000 | 1.029542000  | -0.000047000 |
|                                              |                                                                                     | 16 | -2.603260000 | -0.482546000 | -0.000070000 |
|                                              |                                                                                     | 1  | -0.336082000 | 3.691960000  | 0.000020000  |
|                                              | 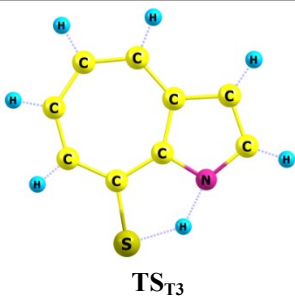   |    |              |              |              |
| Zero-point correction=                       | 0.131281 (Hartree/Particle)                                                         |    |              |              |              |
| Thermal correction to Energy=                | 0.139188                                                                            |    |              |              |              |
| Thermal correction to Enthalpy=              | 0.140133                                                                            |    |              |              |              |
| Thermal correction to Gibbs Free Energy=     | 0.098104                                                                            |    |              |              |              |
| Sum of electronic and zero-point Energies=   | -800.069425                                                                         |    |              |              |              |
| Sum of electronic and thermal Energies=      | -800.061517                                                                         |    |              |              |              |
| Sum of electronic and thermal Enthalpies=    | -800.060573                                                                         |    |              |              |              |
| Sum of electronic and thermal Free Energies= | -800.102602                                                                         |    |              |              |              |
|                                              |                                                                                     | 6  | 0.172525000  | 2.516618000  | 0.001163000  |
|                                              |                                                                                     | 6  | 1.533018000  | 2.202971000  | 0.009167000  |
|                                              |                                                                                     | 6  | 2.119903000  | 0.943779000  | 0.004568000  |
|                                              |                                                                                     | 6  | -0.944881000 | 1.684170000  | -0.013093000 |
|                                              |                                                                                     | 6  | 1.492713000  | -0.299890000 | -0.003135000 |
|                                              |                                                                                     | 6  | -1.034929000 | 0.284662000  | -0.003325000 |
|                                              |                                                                                     | 6  | 0.030919000  | -0.624431000 | -0.003353000 |
|                                              |                                                                                     | 1  | -0.057228000 | 3.578346000  | -0.001099000 |
|                                              |                                                                                     | 1  | 2.214084000  | 3.048036000  | 0.015906000  |
|                                              |                                                                                     | 1  | 3.206872000  | 0.920725000  | 0.008884000  |
|                                              |                                                                                     | 1  | -1.900154000 | 2.195672000  | -0.037187000 |
|                                              |                                                                                     | 6  | 2.125280000  | -1.551502000 | -0.000650000 |
|                                              |                                                                                     | 1  | 3.189797000  | -1.734739000 | 0.000339000  |
|                                              |                                                                                     | 6  | 1.099150000  | -2.499685000 | 0.002399000  |
|                                              |                                                                                     | 7  | -0.138800000 | -1.960024000 | 0.002255000  |
|                                              |                                                                                     | 1  | -2.942302000 | -0.332556000 | 1.253576000  |
|                                              |                                                                                     | 16 | -2.719770000 | -0.394914000 | -0.076536000 |
|                                              |                                                                                     | 1  | 1.214661000  | -3.576841000 | 0.005921000  |
|                                              |   |    |              |              |              |
| Zero-point correction=                       | 0.132273 (Hartree/Particle)                                                         |    |              |              |              |
| Thermal correction to Energy=                | 0.140578                                                                            |    |              |              |              |
| Thermal correction to Enthalpy=              | 0.141522                                                                            |    |              |              |              |
| Thermal correction to Gibbs Free Energy=     | 0.098555                                                                            |    |              |              |              |
| Sum of electronic and zero-point Energies=   | -800.060638                                                                         |    |              |              |              |
| Sum of electronic and thermal Energies=      | -800.052333                                                                         |    |              |              |              |
| Sum of electronic and thermal Enthalpies=    | -800.051388                                                                         |    |              |              |              |
| Sum of electronic and thermal Free Energies= | -800.094356                                                                         |    |              |              |              |
|                                              |                                                                                     | 6  | -3.287617000 | -0.235246000 | 0.000065000  |
|                                              |                                                                                     | 6  | -2.831984000 | 1.091065000  | 0.000059000  |
|                                              |                                                                                     | 6  | -1.534155000 | 1.578412000  | 0.000033000  |
|                                              |                                                                                     | 6  | -2.551417000 | -1.415873000 | 0.000044000  |
|                                              |                                                                                     | 6  | -0.326414000 | 0.862103000  | 0.000009000  |
|                                              |                                                                                     | 6  | -1.167417000 | -1.595636000 | 0.000012000  |
|                                              |                                                                                     | 6  | -0.181687000 | -0.615155000 | -0.000003000 |
|                                              |  |    |              |              |              |
| Zero-point correction=                       | 0.130536 (Hartree/Particle)                                                         |    |              |              |              |
| Thermal correction to Energy=                | 0.138783                                                                            |    |              |              |              |
| Thermal correction to Enthalpy=              | 0.139727                                                                            |    |              |              |              |
| Thermal correction to Gibbs Free Energy=     | 0.096806                                                                            |    |              |              |              |
| Sum of electronic and zero-point Energies=   | -800.032840                                                                         |    |              |              |              |
| Sum of electronic and thermal Energies=      | -800.024057                                                                         |    |              |              |              |
| Sum of electronic and thermal Enthalpies=    | -800.023110                                                                         |    |              |              |              |
| Sum of electronic and thermal Free Energies= | -800.066304                                                                         |    |              |              |              |

|                                                                                                                                             |                             |              |              |              |              |
|---------------------------------------------------------------------------------------------------------------------------------------------|-----------------------------|--------------|--------------|--------------|--------------|
| Sum of electronic and thermal Energies=                                                                                                     | -800.025601                 | 1            | -4.366341000 | -0.356354000 | 0.000089000  |
| Sum of electronic and thermal Enthalpies=                                                                                                   | -800.024657                 | 1            | -3.611359000 | 1.847267000  | 0.000077000  |
| Sum of electronic and thermal Free Energies=                                                                                                | -800.067578                 | 1            | -1.430346000 | 2.660017000  | 0.000033000  |
|                                                                                                                                             |                             | 1            | -3.135694000 | -2.331089000 | 0.000052000  |
|                                                                                                                                             |                             | 6            | 0.970263000  | 1.395695000  | -0.000013000 |
|                                                                                                                                             |                             | 1            | 1.237353000  | 2.440281000  | -0.000012000 |
|                                                                                                                                             |                             | 6            | 1.846084000  | 0.302116000  | -0.000037000 |
|                                                                                                                                             |                             | 7            | 1.141101000  | -0.878638000 | -0.000033000 |
|                                                                                                                                             |                             | 1            | -0.801781000 | -2.617807000 | -0.000003000 |
|                                                                                                                                             |                             | 1            | 2.384085000  | -1.423978000 | -0.000052000 |
|                                                                                                                                             |                             | 16           | 3.507652000  | -0.142048000 | -0.000060000 |
| 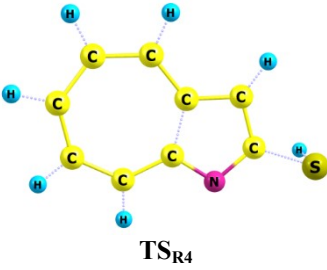 <p style="text-align: center;"><b>TS<sub>R4</sub></b></p> |                             | 6            | 3.324538000  | -0.088590000 | 0.008806000  |
|                                                                                                                                             |                             | 6            | 2.791374000  | 1.206029000  | 0.004239000  |
|                                                                                                                                             |                             | 6            | 1.458441000  | 1.601134000  | -0.001245000 |
|                                                                                                                                             |                             | 6            | 2.676166000  | -1.321704000 | 0.007192000  |
|                                                                                                                                             |                             | 6            | 0.317789000  | 0.795949000  | -0.004821000 |
|                                                                                                                                             |                             | 6            | 1.306924000  | -1.593764000 | -0.000165000 |
|                                                                                                                                             |                             | 6            | 0.252564000  | -0.688332000 | -0.004967000 |
|                                                                                                                                             |                             | 1            | 4.409734000  | -0.137912000 | 0.013764000  |
|                                                                                                                                             |                             | 1            | 3.520361000  | 2.010412000  | 0.005882000  |
|                                                                                                                                             |                             | 1            | 1.279175000  | 2.673485000  | -0.003246000 |
|                                                                                                                                             |                             | 1            | 3.325732000  | -2.191404000 | 0.010962000  |
|                                                                                                                                             |                             | 6            | -1.022168000 | 1.201882000  | -0.012057000 |
|                                                                                                                                             |                             | 1            | -1.403611000 | 2.211272000  | -0.023455000 |
|                                                                                                                                             |                             | 6            | -1.779582000 | 0.019228000  | -0.006585000 |
| 7                                                                                                                                           | -1.033066000                | -1.103293000 | -0.010103000 |              |              |
| 1                                                                                                                                           | 1.004226000                 | -2.636618000 | -0.002479000 |              |              |
| 1                                                                                                                                           | -3.760331000                | 0.038247000  | 1.261930000  |              |              |
| 16                                                                                                                                          | -3.568756000                | -0.064715000 | -0.070938000 |              |              |
| Zero-point correction=                                                                                                                      | 0.132464 (Hartree/Particle) |              |              |              |              |
| Thermal correction to Energy=                                                                                                               | 0.140758                    |              |              |              |              |
| Thermal correction to Enthalpy=                                                                                                             | 0.141702                    |              |              |              |              |
| Thermal correction to Gibbs Free Energy=                                                                                                    | 0.098719                    |              |              |              |              |
| Sum of electronic and zero-point Energies=                                                                                                  | -800.069317                 |              |              |              |              |
| Sum of electronic and thermal Energies=                                                                                                     | -800.061023                 |              |              |              |              |
| Sum of electronic and thermal Enthalpies=                                                                                                   | -800.060079                 |              |              |              |              |
| Sum of electronic and thermal Free Energies=                                                                                                | -800.103062                 |              |              |              |              |
